# Supplementary material
Source: bioRxiv or medRxiv preprint supplement (https://www.biorxiv.org/highwire/filestream/41212/field_highwire_adjunct_files/3/022657-4.pdf)

(a)

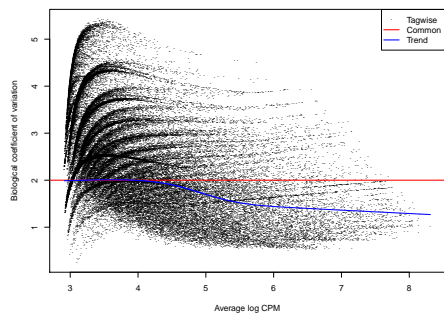

(b)

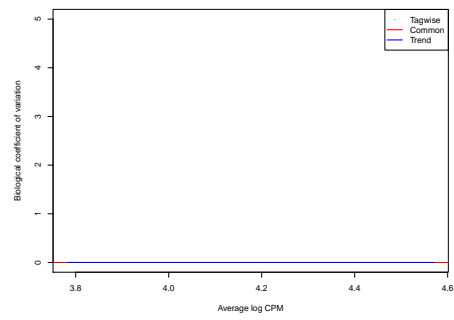

Supplement: Supplementary file [file 022657-4.pdf]
